# Supplementary material for: Genetic Diversity and Population Structure of the Invasive Oriental Fruit Fly, Bactrocera dorsalis (Diptera: Tephritidae) in Burkina Faso
Source: Preprints.org preprint supplement (doi:10.20944/preprints202403.0010.v1), 2024-03-01
Supplement: Supplementary file 1 [file supplementary]

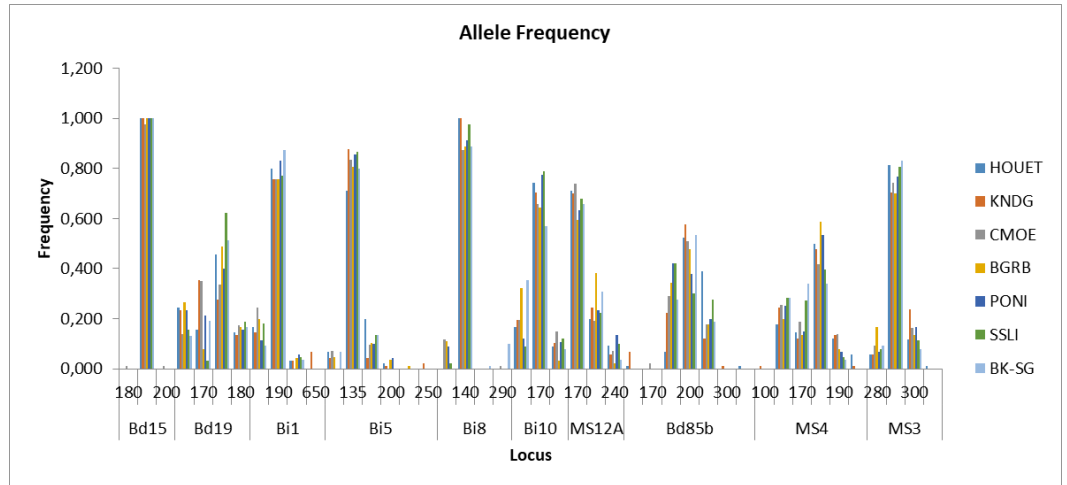

Figure S1: Allele frequencies by population with over loci

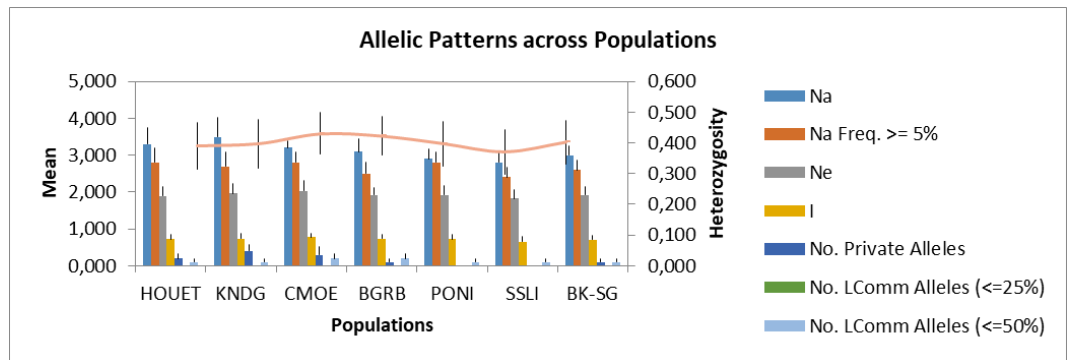

Figure S2: Allelic patterns across populations

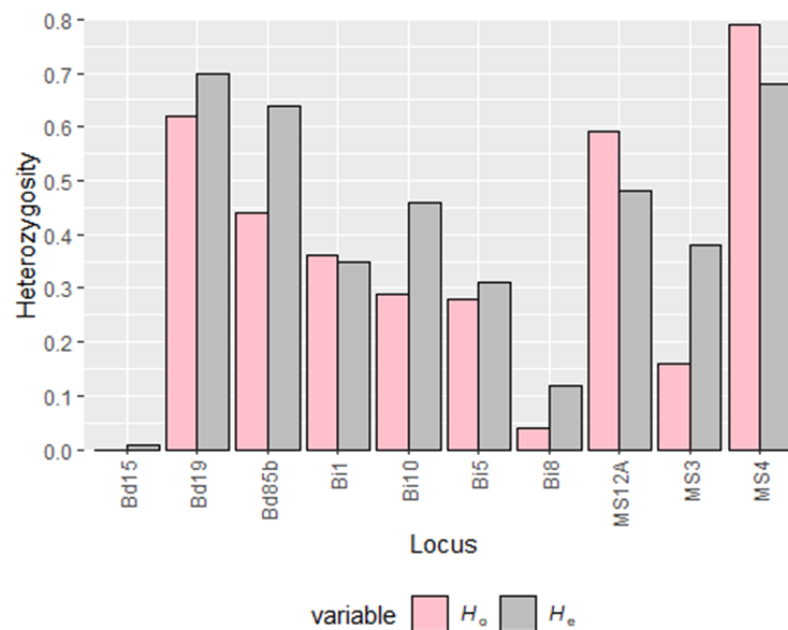

Figure S3: Comparison of observed and expected heterozygosity averages by locus

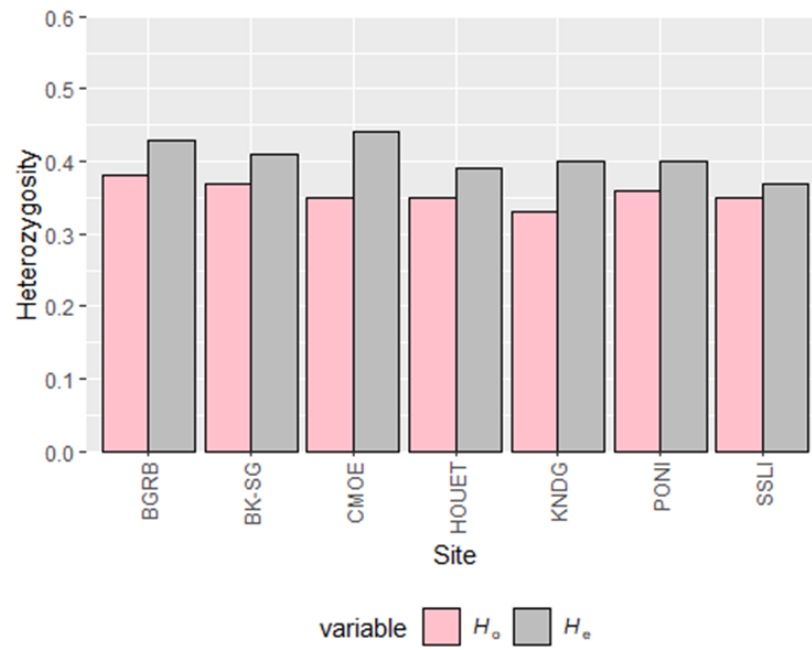

**Figure S4:** Comparison of observed and expected heterozygosity averages by sub-population

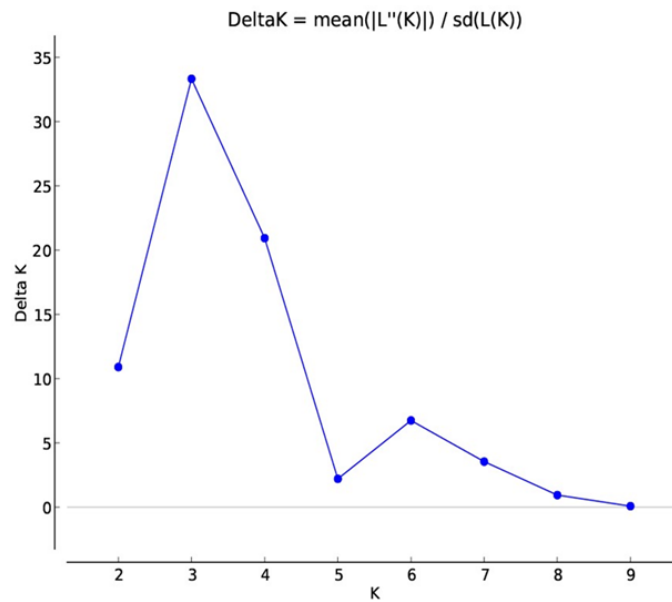

**Figure S5:** Evanno et al. (2012) plots for detecting the best number of K value.

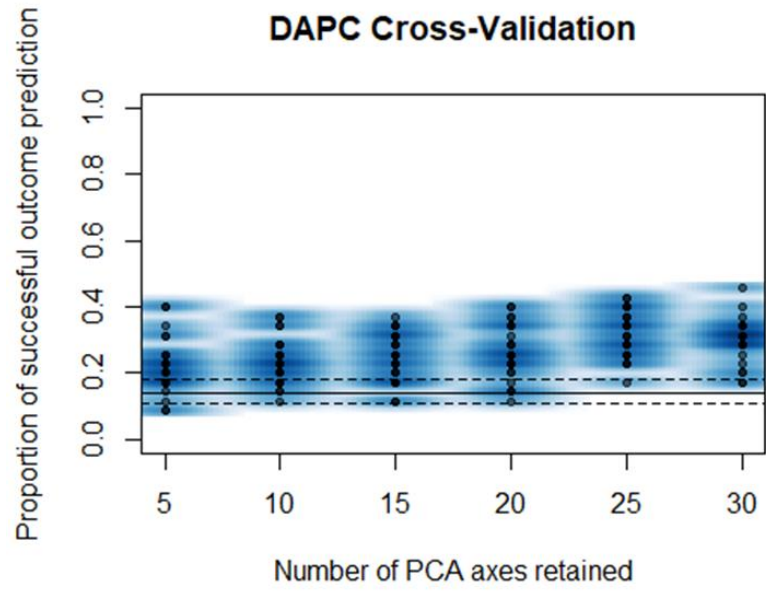

**Figure S6:** DAPC cross-validation plot for the best number of PCs

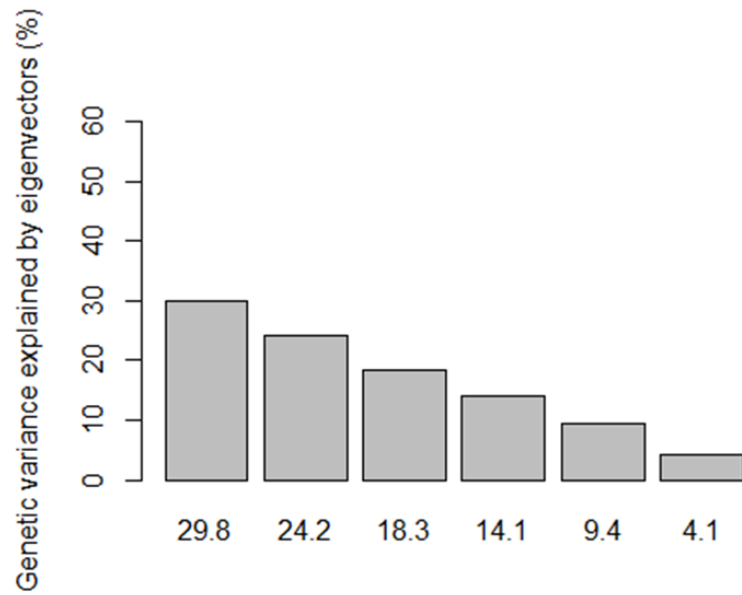

**Figure S7:** Genetic variance explained by eigenvectors

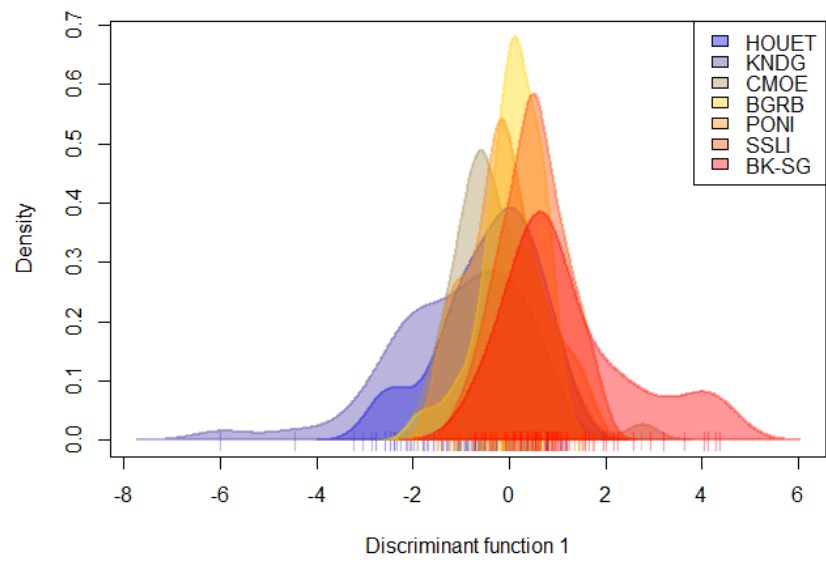

**Figure 8.** Individual density plot on the first discriminant function.
